# Supplementary material for: Mechanical stimulation promotes enthesis injury repair by mobilizing Prrx1+ cells via ciliary TGF-β signaling
Source: eLife. 2022 Apr 27;11:e73614. doi: 10.7554/eLife.73614 (PMC9094755; doi:10.7554/eLife.73614)
Supplement: Figure 3—source data 1. [file elife-73614-fig3-data1.xlsx]

## Sheet: Sheet1
Figure 3c
Prrx1+ cells in develepmental enthesis (0.1mm-2)
1Week	4Week	8Week
224.1	63.1	1.8
238.9	59.5	1
237	46.8	1.2
227.8	44.7	2
246.2	46.8	1.6
194.4	42.9	1.4
Figure 3f
tdTomato+ cells in enthesis (0.1mm-2)
2W-12W	4W-12W	8W-12W
150.5	50.5	0
137.3	30.6	0
128.2	41.7	0
125.2	38.6	0
141.4	58.6	0
144.4	40.7	0
