# Supplementary material for: Mechanical stimulation promotes enthesis injury repair by mobilizing Prrx1+ cells via ciliary TGF-β signaling
Source: eLife. 2022 Apr 27;11:e73614. doi: 10.7554/eLife.73614 (PMC9094755; doi:10.7554/eLife.73614)
Supplement: Figure 4—source data 1. — The source data of quantitative analysis of fibrocartilage thickness for Figure 4d. The source data of quantitative analysis of Failure Load and stiffness for Figure 4e. [file elife-73614-fig4-data1.xlsx]

## Sheet: Sheet1
Figure 5c Histological Score
	Control						10 Minutes						20 Minutes						30 Minuets
4W	15	14	16	17	15	16	16	17	15	18	19	18	19	18	19	20	18	21	12	14	15	15	14	13
8W	22	22	24	23	23	24	24	25	26	26	26	27	25	26	27	26	26	25	19	20	21	20	21	22
Figure 5d Fibrocartilage area (mm2)
Control	10 Min	20 Min	30 Min
0.061	0.072	0.145	0.051
0.057	0.098	0.123	0.041
0.046	0.087	0.141	0.045
0.048	0.081	0.168	0.039
0.038	0.076	0.154	0.032
0.041	0.092	0.139	0.026
Figure 5e Failure Load （N）
	Control									10 Minutes									20 Minutes									30 Minuets									Native
4W	3.81	3.43	3.85	3.61	4.06	2.97	3.59	3.35	3.75	3.59	3.84	3.94	3.75	3.69	4.25	4.31	4.26		4.12	3.84	4.34	4.15	4.57	4.29	4.31	4.56		3.18	2.63	3.08	3.45	3.31	3.57	3.41	3.29	2.89	4.86	6.01	5.58	5.78	5.87	5.65	5.12	6.12	5.95
8W	4.94	4.12	4.53	5.02	4.67	4.65	5.34	4.89	4.02	5.56	4.89	4.63	4.55	4.78	4.65	5.12	5.45	5.23	4.79	4.87	4.89	5.16	5.08	5.33	5.65	4.87		3.86	3.97	4.45	4.57	4.56	4.73	4.89	4.67	4.22	4.86	6.01	5.58	5.78	5.87	5.65	5.12	6.12	5.95
Figure 5e Stiffness (N/mm)
	Control									10 Minutes									20 Minutes									30 Minuets									Native
4W	3.18	2.86	3.21	3.01	3.38	3.48	2.99	3.79	3.96	2.99	3.2	4.48	3.13	3.08	4.12	3.59	3.55		3.43	3.03	3.62	3.46	3.81	3.38	4.59	3.8	3.41	3.65	2.89	2.57	3.41	2.76	2.98	3.24	2.74	3.41	4.05	3.02	3.65	3.82	4.39	4.71	4.17	3.96	4.56
8W	3.19	3.1	3.46	3.73	3.63	3.85	4.19	4.55	4.27	3.09	3.27	3.39	3.76	3.61	3.97	4.29	4.55	4.04	3.11	3.25	3.19	3.67	3.81	3.72	4.01	4.33		3.23	3.45	3.79	3.12	4.12	4.53	4.17	3.08	4.33	4.05	3.02	3.65	3.82	4.39	4.71	4.17	3.96	4.56
