# Supplementary material for: Mechanical stimulation promotes enthesis injury repair by mobilizing Prrx1+ cells via ciliary TGF-β signaling
Source: eLife. 2022 Apr 27;11:e73614. doi: 10.7554/eLife.73614 (PMC9094755; doi:10.7554/eLife.73614)
Supplement: Figure 5—source data 1. [file elife-73614-fig5-data1.xlsx]

## Sheet: Sheet1
Figure 4c
tdTomato+ cells in the injuered enthesis (mm-2)
Control	10 Min	20 Min	30 Min
160	220	470	90
145	207	442	82
131	179	469	71
125	213	459	97
156	183	461	89
133	195	429	68
