# Supplementary material for: Mechanical stimulation promotes enthesis injury repair by mobilizing Prrx1+ cells via ciliary TGF-β signaling
Source: eLife. 2022 Apr 27;11:e73614. doi: 10.7554/eLife.73614 (PMC9094755; doi:10.7554/eLife.73614)
Supplement: Figure 6—figure supplement 1—source data 1. — The source data of quantitative analysis of migration cells in transwell assay for Figure 6—figure supplement 1d. The source data of quantitative analysis of western blot for Figure 6—figure supplement 1f. [file elife-73614-fig6-figsupp1-data1.xlsx]

## Sheet: Sheet1
Figure 6-figuer supplement 1c Migrated rate (%)
Control					Tension					No tension					Native
22.2	26.5	19.7	23.6	20.8	70.8	65.9	75.3	68.5		59.7	50.7	51.2	49.5	55.7	21.3	18.5	17.5	22.5	20.8
40.3	48.8	39.8	46.8	41.6	95.4	93.4	97.6	94.8	95.9	69.9	61.2	62.9	60.4	70.3	47.5	36.3	43.6	42.4	39.9
Figure 6-figuer supplement 1d Migrated cells
Control	Tension	No tension	Native
68	167	85	63
57	157	91	53
76	149	82	73
63	170	94	65
51	150	80	59
Figure 6-figuer supplement 1f Quantitative analysis of western blot （pSmad2/3）
Control	Tension	No tension	Native
0.12	0.38	0.23	0.11
0.14	0.4	0.2	0.15
0.1	0.35	0.21	0.12
0.14	0.41	0.26	0.12
0.13	0.37	0.25	0.14
