# Supplementary material for: Mechanical stimulation promotes enthesis injury repair by mobilizing Prrx1+ cells via ciliary TGF-β signaling
Source: eLife. 2022 Apr 27;11:e73614. doi: 10.7554/eLife.73614 (PMC9094755; doi:10.7554/eLife.73614)
Supplement: Figure 6—source data 1. — The source data of quantitative analysis of H&E score and fibrocartilage thickness for Figure 6d. The source data of quantitative analysis of Failure Load and stiffness for Figure 6e. The source data of quantitative analysis of migration Prrx1+ cells at the healing area for Figure 6g. [file elife-73614-fig6-data1.xlsx]

## Sheet: Sheet1
Figure 6b TGF-beta1 concentration in enthesis
	Control-RC			Treadmill-RC			Control-perichondrium			Treadmill-perichondrium
0d	1.04171	0.865343	0.593792	0.868054	0.598901	0.925927	0.52	0.45	0.31	0.87	0.13	0.28
3d	6.87388	5.77603	7.59883	4.48362	5.49093	12.1992	0.63	0.18	0.45	0.21	0.15	0.63
1w	27.68	25.352	23.9404	25.3775	22.2466	19.0797	0.22	0.59	0.27	0.67	0.53	0.44
2w	39.603	30.1298	35.9329	76.2004	47.2499	51.0393	0.17	0.56	0.57	0.49	0.42	0.29
4w	27.0214	21.7051	26.8376	37.4444	49.9724	41.0158	0.36	0.55	0.78	0.74	0.47	0.32
8w	3.42472	5.60673	8.05729	2.42494	4.70021	9.85059	0.39	0.11	0.74	0.44	0.34	0.66
10w	0.682606	0.981478	1.45358	0.949353	0.806949	1.03146	0.14	0.96	0.22	0.36	0.58	0.24
Figure 6d Histological score
	Hydrogel						Treadmill with hydrogel						Hydrogel with ab64715						Teadmill with ab64715
4W	15	13	16	17	14	17	19	19	19	22	18	20	12	13	13	14	15	14	12	14	14	15	13	12
8W	22	22	24	23	23	24	24	25	26	26	26	27	21	22	20	22	19	19	19	20	21	20	21	22
Figure 6d Fibrocartilage area (mm2)
Hydrogel	Treadmill with hydrogel	Hydrogel with ab64715	Treadmill with ab64715
0.061	0.172	0.052	0.051
0.057	0.143	0.043	0.041
0.046	0.131	0.035	0.025
0.058	0.161	0.029	0.039
0.05	0.159	0.018	0.038
0.039	0.169	0.027	0.026
Figure 6e Failure Load
	Hydrogel									Treadmill with hydrogel									Hydrogel with ab186838									Treadmill with ab186838									Native
4w	3.22	4.11	3.87	4.04	3.45	3.59	3.49	3.55	3.63	3.78	3.66	3.87	3.97	4.41	4.13	4.28	4.15	4.06	3.14	3.24	3.46	3.78	3.05	4.08	4.06	3.67	3.39	3.05	3.13	3.56	3.32	3.89	3.96	3.44	3.67	3.11	4.86	6.01	5.58	5.78	5.87	5.65	5.12	6.12	5.95
8w	3.84	4.23	4.44	5.12	4.34	4.78	4.34	4.97	4.09	4.56	4.99	5.61	4.65	4.72	4.69	5.22	5.49	5.22	3.78	4.56	4.63	4.21	4.09	4.79	4.83	4.11	4.19	3.97	4.03	4.15	4.21	4.35	4.67	4.79	4.98	4.44	4.86	6.01	5.58	5.78	5.87	5.65	5.12	6.12	5.95
Figure 6e Stifness
	Hydrogel									Treadmill with hydrogel									Hydrogel with ab186838									Treadmill with ab186838									Native
4w	2.68	3.43	3.23	3.37	2.88	2.99	2.91	2.96	3.03	3.15	3.05	3.23	3.31	3.23	3.44	3.48	3.46	3.38	2.62	2.7	2.88	3.15	2.54	3.4	3.42	3.06	2.83	2.54	2.61	2.97	2.77	3.24	3.3	2.87	3.06	2.59	4.05	5.01	4.65	4.82	4.89	4.71	4.27	5.1	4.96
8w	3.2	3.53	3.7	4.27	3.62	3.98	3.62	4.14	3.41	3.8	4.16	4.68	3.88	3.93	3.91	4.35	4.58	4.35	3.15	3.8	3.86	3.51	3.41	3.99	4.03	3.43	3.49	3.31	3.36	3.46	3.51	3.63	3.89	3.99	4.15	3.7	4.05	5.01	4.65	4.82	4.89	4.71	4.27	5.1	4.96
Figure 6g tdTomato+ cells at enthesis (mm-2)
Hydrogel	Treadmill	Hydrogel+ab64715	Treadmill+ab64715
195	482	131	128
179	519	109	102
239	536	98	87
212	543	87	75
165	567	61	97
187	506	79	61
