# Supplementary material for: Mechanical stimulation promotes enthesis injury repair by mobilizing Prrx1+ cells via ciliary TGF-β signaling
Source: eLife. 2022 Apr 27;11:e73614. doi: 10.7554/eLife.73614 (PMC9094755; doi:10.7554/eLife.73614)
Supplement: Figure 7—source data 1. — The source data of quantitative analysis of H&E score and fibrocartilage area at the enthesis for Figure 7d. The source data of quantitative analysis of Tdtomato+ cells in the healing area for Figure 7f. The source data of quantitative analysis of load failure and stiffness of enthesis for Figure 7g. [file elife-73614-fig7-data1.xlsx]

## Sheet: Sheet1
Figure 7b Ciliated cell percent (%)
	Prrx1+ cells					Prrx1- cells
Control	68.4	66.7	77.8	63.9	71.8	68.1	69.9	74.1	75.8	62.5
KO	1.3	2.1	1.9	3.1	2.6	65.9	70.2	61.1	75.9	66.3
Figure 7d Histological score
	Control						No cilia						Treadmill without cilia
4w	15	14	16	17	15	16	12.2	14.3	13.6	13.3	14.5	14.9	12.2	13.1	15.6	14.8	13.9	13.1
8w	22	22	24	23	23	24	18.4	19.5	20.6	21.5	21.8	19.7	20.6	19.2	19.4	20.2	21.3	18.1
Figure 7d Fibrocartilage area (mm2)
Control	No cilia	Treadmill without cilia
0.061	0.056	0.049
0.057	0.047	0.045
0.046	0.041	0.043
0.048	0.037	0.037
0.038	0.029	0.031
0.041	0.025	0.026
Figure 7f tdTomato+ cells in enthesis
Control	No cilia	Treadmill without cilia
160	101	109
145	113	117
131	98	119
125	123	125
156	131	138
113	142	139
Figure 7g Falure Load (N)
	Control									No cilia									Treadmill without cilia									Native
4w	3.81	3.43	3.85	3.61	4.06	2.97	3.59	3.35	3.75	3.08	3.29	3.42	3.86	3.19	4.17	3.93	3.53	3.13	3.07	3.13	3.22	3.31	3.56	3.89	3.77	3.98	4.05	4.86	6.01	5.58	5.78	5.87	5.65	5.12	6.12	5.95
8w	4.94	4.12	4.53	5.02	4.67	4.65	5.34	4.89	4.02	3.65	4.59	4.57	4.34	4.11	4.67	4.81	4.23	4.15	3.41	4.11	4.37	4.21	4.57	4.89	4.93	4.62	4.39	4.86	6.01	5.58	5.78	5.87	5.65	5.12	6.12	5.95
Figure 7g Stifness (N/mm)
	Control									No cilia									Treadmill without cilia									Native
4w	3.18	2.86	3.21	3.01	3.38	3.48	2.99	3.79	3.96	2.57	2.74	2.85	3.22	2.66	3.48	3.28	2.94	2.61	2.56	2.61	2.68	2.76	2.97	3.24	3.14	3.32	3.38	4.05	3.02	3.65	3.82	4.39	4.71	4.17	3.96	4.56
8w	3.19	3.1	3.46	3.73	3.63	3.85	4.19	4.55	4.27	3.04	3.83	3.81	3.62	3.43	3.89	4.01	3.53	3.46	2.84	3.43	3.64	3.51	3.81	4.08	4.11	3.85	3.66	4.05	3.02	3.65	3.82	4.39	4.71	4.17	3.96	4.56
