# Supplementary material for: Mechanical stimulation promotes enthesis injury repair by mobilizing Prrx1+ cells via ciliary TGF-β signaling
Source: eLife. 2022 Apr 27;11:e73614. doi: 10.7554/eLife.73614 (PMC9094755; doi:10.7554/eLife.73614)
Supplement: Figure 8—figure supplement 1—source data 1. [file elife-73614-fig8-figsupp1-data1.xlsx]

## Sheet: Sheet1
Figure 8 S1b Quantitative analysis of the western blot (ift88)
Control	KO
0.21	0.04
0.17	0.04
0.21	0.05
0.19	0.03
0.2	0.05
Figure 8 S1b ciliated cell percent (%)
Control	KO
86	12
81	8
92	15
76	7
71	11
