# Supplementary material for: Mechanical stimulation promotes enthesis injury repair by mobilizing Prrx1+ cells via ciliary TGF-β signaling
Source: eLife. 2022 Apr 27;11:e73614. doi: 10.7554/eLife.73614 (PMC9094755; doi:10.7554/eLife.73614)
Supplement: Figure 8—source data 1. — The source data of quantitative analysis of western blot for Figure 8d. The source data of quantitative analysis of cell percent that the TGF-βR2 was concentrated in the primary cilia for Figure 8f. The source data of quantitative analysis of scratch assay and transwell assay for Figure 8h. The source data of quantitative analysis of western blot for Figure 8j. [file elife-73614-fig8-data1.xlsx]

## Sheet: Sheet1
Figure 8b Primariy cilia with TGF-beta R2 （%）
Native	Control	Tension
8.2	45.6	78.7
12.6	39.3	89.5
16.3	48.6	82.4
13.1	36.5	79.3
10.9	42.1	83.6
Figure 8c Quantitative analysis of western blot (PLDN)
Control	Knock down
0.2	0.03
0.2	0.03
0.22	0.02
0.25	0.02
0.21	0.04
Figure 8f Primariy cilia with TGF-beta R2
Tension	Knock down	Native
75.1	7.5	8.7
85.3	9.7	11.6
87.5	13.3	17.4
89.2	14.6	15.3
83.8	8.8	9.2
Figure 8h Migration area
	Control					Sham					KD					No cilia
12h	41.2	48.7	54.3	59.6	46.3	61.5	72.5	73.9	65.5	70.1	43.8	32.7	49.6	37.5	51.6	24.5	21.3	19.8	22.6	18.5
24h	72.5	63.5	61.9	58.8	68.7	90.8	97.4	98.3	92.6	91.2	61.5	58.6	55.3	72.1	63.7	36.5	41.3	46.5	33.1	38.7
Figure 8h Migration cells
Control	Sham	KD	No cilia
112	202	101	99
98	224	121	90
109	213	110	87
89	189	87	77
124	196	99	65
Figure 8k Quantitative analyses of western blot (pSmad)
Control	Sham	KD	No cilia
0.15	0.38	0.11	108
0.12	0.32	0.16	90
0.13	0.36	0.14	87
0.12	0.38	0.17	96
0.15	0.35	0.11	115
